# Supplementary material
Source: PubMed Central journal article supplement (PMC2785666)
Supplement: supp_M109.028316_jbc.M109.028316-1.pdf [file supp_M109.028316_jbc.M109.028316-1.pdf]

SUPPLEMENTAL FIGURES

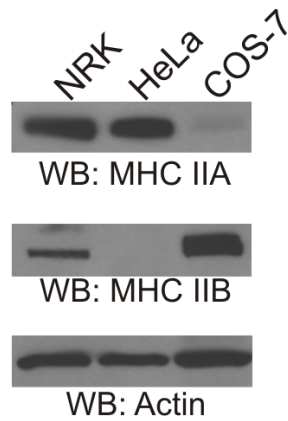

**Figure S1. MHC Isoform Expression Levels.** Whole cell lysates of NRK (Normal Rat Kidney), HeLa, and COS-7 cells were subjected to western blot analysis. NRK cells were used as a positive control as they express both MHC IIA and IIB. HeLa express only MHC IIA while COS-7 express no MHC-IIA but express MHC IIB.

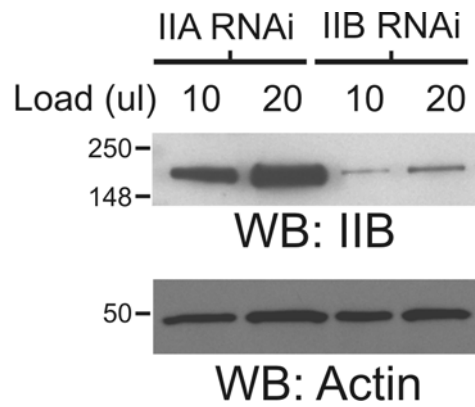

**Figure S2. Suppression of MHC IIB Protein Expression with siRNA.** COS-7 cells were transfected with MHC IIA siRNA as a control, or with MHC IIB siRNA. Whole cell protein lysates were collected after 72 hrs. Samples were normalized by performing SDS-PAGE and Coomassie staining, followed by whole-lane densitometry analysis with NIH ImageJ software. Western blots were then performed with the normalized lysates. Two quantities were loaded for each sample.
